# Supplementary material
Source: PubMed Central journal article supplement (PMC5119030)
Supplement: AAC.01888-16_zac012165782s1.pdf [file AAC.01888-16_zac012165782s1.pdf]

## 1 **FIGURE LEGENDS**

2 FIG S1 Analysis of caspofungin or anidulafungin susceptibility of the mutants lacking *CHT2*,  
3 *CSU51* or *PGA4* by spot assay. (A and B) Shown are two independent repeats for growth of  
4 all single- or double-deletion mutants vs their parental strain CAF4-2 on medium  
5 supplemented with caspofungin (CAS) and for growth of representative double-deletion  
6 mutants vs their parental strain CAF4-2 on medium supplemented with anidulafungin (ANI).  
7 Strains are indicated on the left. From left to right, the number of cells that were spotted onto  
8 each plate, were  $10^4$ ,  $10^3$ ,  $10^2$ , and  $10^1$ . Plates were incubated at 37°C.

9 FIG S2 Analysis of caspofungin (CAS) susceptibility of the representative double-deletion  
10 mutants NAC4 a.k.a. *cht2*<sup>-/-</sup>, NACS1 a.k.a. *csu51*<sup>-/-</sup>, NAP88 a.k.a. *pga4*<sup>-/-</sup> by standard broth  
11 microdilution assay. (A and B) Shown are two independent repeats for growth of mutants vs  
12 their parental strain CAF4-2 in different concentration of caspofungin as indicated. For more  
13 explanations see the legend of Fig. 3B. Data are presented as the best fit curve (see Materials  
14 and Methods).

15 FIG S3 Analysis of anidulafungin (ANI) susceptibility of the representative double-deletion  
16 mutants NAC4 a.k.a. *cht2*<sup>-/-</sup>, NACS1 a.k.a. *csu51*<sup>-/-</sup>, NAP88 a.k.a. *pga4*<sup>-/-</sup> by standard broth  
17 microdilution assay. (A and B) Shown are two independent repeats for growth of mutants vs  
18 their parental strain CAF4-2 in different concentration of caspofungin as indicated. For more  
19 explanations see the legend of Fig. S3. Note that experiment was conducted on the same  
20 microtiter plate.

21 FIG S4 Analysis of caspofungin susceptibility of *pga4*<sup>-/-</sup> and FJS5 mutants with both copies  
22 of either *PGA4* (1) or *CHT2* (2), respectively, disrupted with the *Tn7*-UAU1 cassette, as well  
23 as of the mutant DSY1768 (3) having incomplete deletion of ORF of *CHT2*. Shown is the  
24 spot assay for growth of the mutant FJS5 vs the control strain DAY286 (and also vs the

25 parental strain BWP17) or of the mutant DSY1768 or the mutant *pga4*<sup>-/-</sup> vs the control strain  
26 CAF2-1 on control YPD medium supplemented with arginine, histidine and uridine, as well  
27 as on YPD medium supplemented with the aforementioned aminoacids and caspofungin  
28 (CAS), as indicated. Strains are indicated on the left. From left to right, 10<sup>4</sup>, 10<sup>3</sup>, 10<sup>2</sup>, and  
29 10<sup>1</sup> cells were spotted on each plate and incubated for 3 days at 37°C.

30 FIG S5 Example of semiquantitative RT-PCR analysis of products amplified from total RNA  
31 from deletion strain JMC200-3-3 and its parental strain JRCT1. The *CHT2*, *CSU51* or *PGA4*  
32 gene was amplified and ran on a conventional electrophoresis gel, which was ethidium  
33 bromide stained and photographed and the imaged was processed, as described in Materials  
34 and Methods. Lanes show products sampled at increasing cycles. Values for the *CHT2*,  
35 *CSU51* or *PGA4* gene were normalized against control *REX2*. *CHT2*, *CSU51* or *PGA4*  
36 monosomic to disomic (JMC200-3-3/JRCT1) ratio was calculated, as averaged from three  
37 consecutive cycles.

38

39 TABLE S1 Calculated values<sup>a</sup> of caspofungin MICs (ng/ml) for double-deletion  
 40 mutants and CAF4-2 (2<sup>nd</sup> and 3<sup>rd</sup> set of experiments)

|                   | NAC4    |                                   | NACS1  |                                    | NAP88  |                                   |
|-------------------|---------|-----------------------------------|--------|------------------------------------|--------|-----------------------------------|
|                   | CAF4-2  | a.k.a. <i>cht2</i> <sup>-/-</sup> | CAF4-2 | a.k.a. <i>csu51</i> <sup>-/-</sup> | CAF4-2 | a.k.a. <i>pga4</i> <sup>-/-</sup> |
| MIC <sub>50</sub> | 91 ± 4  | 122 ± 1                           | 31 ± 1 | 63 ± 14                            | 45 ± 2 | 123 ± 1                           |
| MIC <sub>70</sub> | 105 ± 5 | 125 ± 1                           | 39 ± 1 | 107 ± 26                           | 59 ± 3 | 123 ± 1                           |
| MIC <sub>80</sub> | 115 ± 6 | 128 ± 1                           | 46 ± 1 | 150 ± 36                           | 70 ± 4 | 124 ± 1                           |
| MIC <sub>90</sub> | 139 ± 1 | 171 ± 1                           | 58 ± 1 | 248 ± 59                           | 90 ± 5 | 124 ± 6                           |

<sup>a</sup> MIC<sub>50</sub>, MIC<sub>70</sub>, MIC<sub>80</sub>, or MIC<sub>90</sub> refers to the concentration of caspofungin at which 50%, 70%, 80%, or 90% of growth is inhibited. See Materials and Methods for the calculation of MIC values. The differences between mutants and CAF4-2 were evaluated with Student's *t* test and all p-values were <0.05.

|                   | NAC4    |                                   | NACS1   |                                    | NAP88   |                                   |
|-------------------|---------|-----------------------------------|---------|------------------------------------|---------|-----------------------------------|
|                   | CAF4-2  | a.k.a. <i>cht2</i> <sup>-/-</sup> | CAF4-2  | a.k.a. <i>csu51</i> <sup>-/-</sup> | CAF4-2  | a.k.a. <i>pga4</i> <sup>-/-</sup> |
| MIC <sub>50</sub> | 117 ± 5 | 206 ± 11                          | 96 ± 6  | 154 ± 25                           | 60 ± 1  | 157 ± 4                           |
| MIC <sub>70</sub> | 146 ± 6 | 233 ± 13                          | 103 ± 6 | 260 ± 56                           | 75 ± 1  | 193 ± 5                           |
| MIC <sub>80</sub> | 167 ± 7 | 254 ± 14                          | 107 ± 6 | 362 ± 101                          | 87 ± 1  | 220 ± 6                           |
| MIC <sub>90</sub> | 206 ± 9 | 284 ± 15                          | 113 ± 6 | 331 ± 26                           | 108 ± 1 | 267 ± 7                           |

<sup>a</sup> MIC<sub>50</sub>, MIC<sub>70</sub>, MIC<sub>80</sub>, or MIC<sub>90</sub> refers to the concentration of caspofungin at which 50%, 70%, 80%, or 90% of growth is inhibited. See Materials and Methods for the calculation of MIC values. The differences between mutants and CAF4-2 were evaluated with Student's *t* test and all p-values were <0.05.

41 TABLE S2 Calculated values<sup>a</sup> of anidulafungin MICs (ng/ml) for double-deletion  
 42 mutants and CAF4-2 (2<sup>nd</sup> and 3<sup>rd</sup> set of experiments)

|                   | CAF4-2     | NAC4<br>a.k.a. <i>cht2</i> <sup>-/-</sup> | NACS1<br>a.k.a. <i>csu51</i> <sup>-/-</sup> | NAP88<br>a.k.a. <i>pga4</i> <sup>-/-</sup> |
|-------------------|------------|-------------------------------------------|---------------------------------------------|--------------------------------------------|
| MIC <sub>50</sub> | 8.5 ± 1    | 25 ± 2.1*                                 | 11.5 ± 1.2                                  | 64.5 ± 1.2*                                |
| MIC <sub>70</sub> | 12 ± 1.4   | 22.7 ± 1.8*                               | 14.6 ± 1.5                                  | 71.5 ± 3.1*                                |
| MIC <sub>80</sub> | 15 ± 1.8   | 24.3 ± 1.9*                               | 16.9 ± 1.8                                  | 68.8 ± 1.4*                                |
| MIC <sub>90</sub> | 20.8 ± 2.5 | 27.0 ± 2.2                                | 21.3 ± 2.2                                  | 73.4 ± 1.8*                                |

<sup>a</sup> MIC<sub>50</sub>, MIC<sub>70</sub>, MIC<sub>80</sub>, or MIC<sub>90</sub> refers to the concentration of caspofungin at which 50%, 70%, 80%, or 90% of growth is inhibited. See Materials and Methods for the calculation of MIC values. The differences between mutants and CAF4-2 were evaluated with Student's *t* test and p-values indicated as an asterisk (\*) were <0.001.

|                   | CAF4-2     | NAC4<br>a.k.a. <i>cht2</i> <sup>-/-</sup> | NACS1<br>a.k.a. <i>csu51</i> <sup>-/-</sup> | NAP88<br>a.k.a. <i>pga4</i> <sup>-/-</sup> |
|-------------------|------------|-------------------------------------------|---------------------------------------------|--------------------------------------------|
| MIC <sub>50</sub> | 9.1 ± 1.0  | 21.6 ± 0.9*                               | 13.6 ± 0.8*                                 | 31.9 ± 1.6*                                |
| MIC <sub>70</sub> | 11.1 ± 1.3 | 24.5 ± 1.0*                               | 15.1 ± 0.9*                                 | 35.6 ± 1.8*                                |
| MIC <sub>80</sub> | 12.6 ± 1.4 | 26.6 ± 1.1*                               | 16.2 ± 1.0                                  | 38.1 ± 1.9*                                |
| MIC <sub>90</sub> | 15.2 ± 1.7 | 30.1 ± 1.3*                               | 17.9 ± 1.1                                  | 42.3 ± 2.1*                                |

<sup>a</sup> MIC<sub>50</sub>, MIC<sub>70</sub>, MIC<sub>80</sub>, or MIC<sub>90</sub> refers to the concentration of caspofungin at which 50%, 70%, 80%, or 90% of growth is inhibited. See Materials and Methods for the calculation of MIC values. The differences between mutants and CAF4-2 were evaluated with Student's *t* test and all p-values indicated as an asterisk (\*) were <0.05.

44 **REFERENCES**

45

46 1. **Plaine A, Walker L, Da Costa G, Mora-Montes HM, McKinnon A, Gow NA,**  
47 **Gaillardin C, Munro CA, Richard ML.** 2008. Functional analysis of *Candida*  
48 *albicans* GPI-anchored proteins: roles in cell wall integrity and caspofungin  
49 sensitivity. *Fungal Genet Biol* **10**:1404-1414.

50 2. **Nobile CJ, Andes DR, Nett JE, Smith FJ, Yue F, Phan QT, Edwards JE, Filler**  
51 **SG, Mitchell AP.** 2006. Critical role of Bcr1-dependent adhesins in *C. albicans*  
52 biofilm formation in vitro and in vivo. *PLoS Pathog* **2**:e63.

53 3. **Selvaggini S, Munro CA, Paschoud S, Sanglard D, Gow NA.** 2004. Independent  
54 regulation of chitin synthase and chitinase activity in *Candida albicans* and  
55 *Saccharomyces cerevisiae*. *Microbiology* **150**:921-928.

56

**Fig. S1**

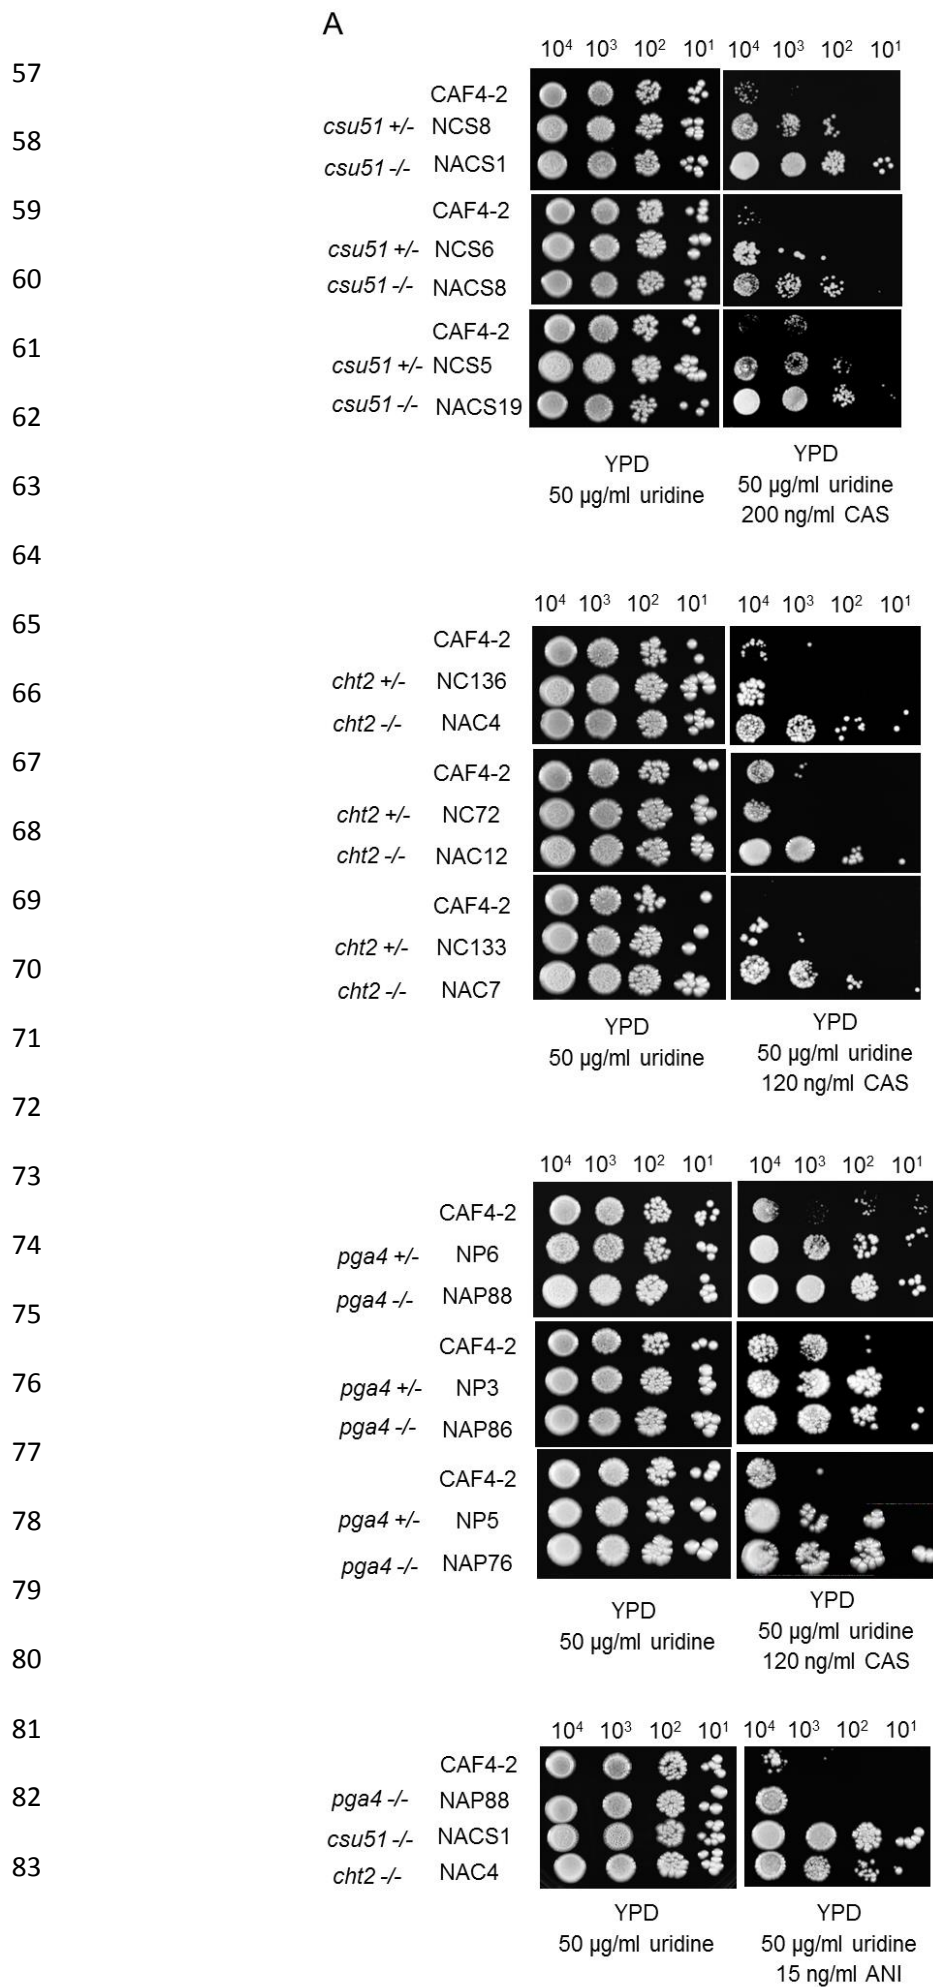

84  
85  
86  
87  
88  
89  
90  
91  
92  
93  
94  
95  
96  
97  
98  
99  
100  
101  
102  
103  
104  
105  
106  
107  
108  
109  
110

**Fig. S1**

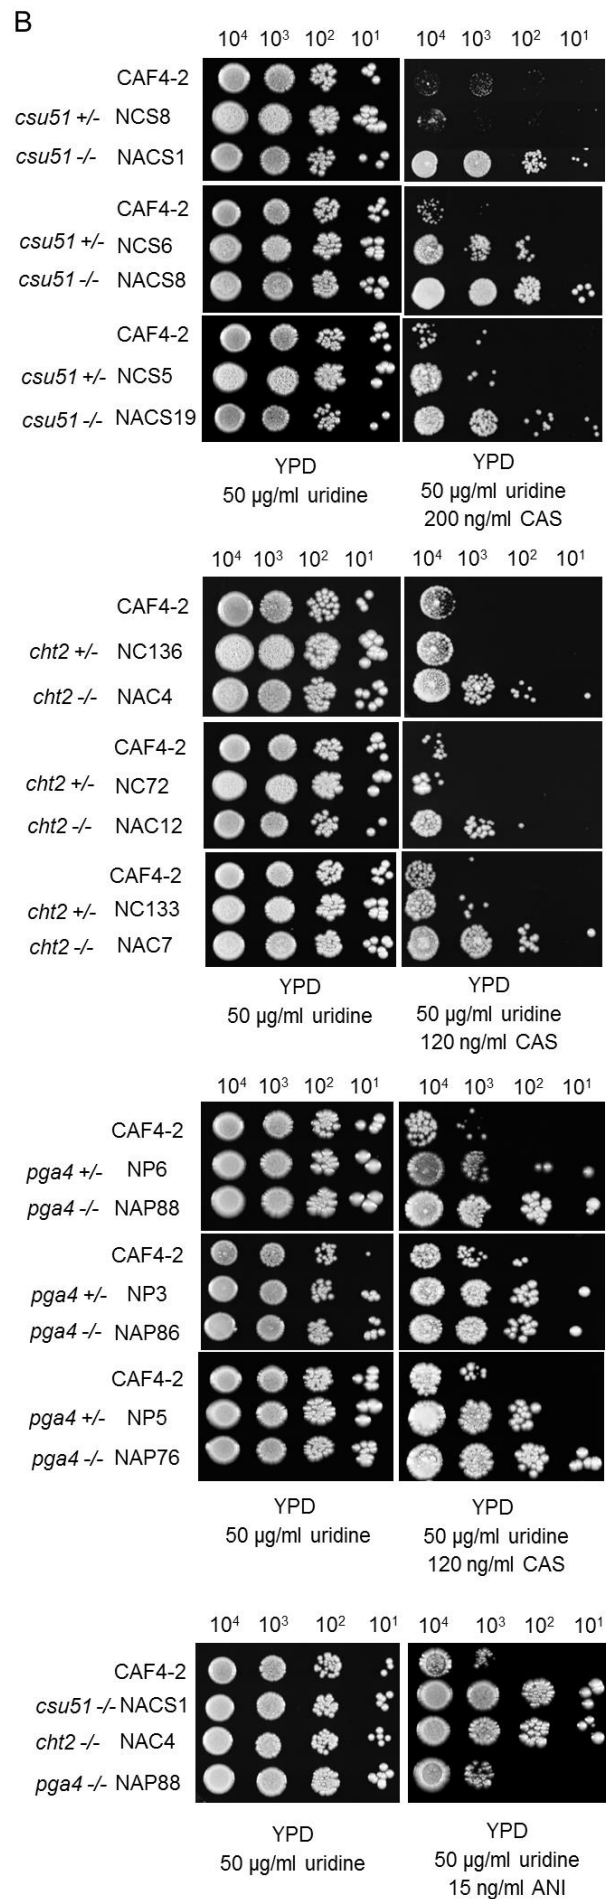

111 FIG S1 Analysis of caspofungin or anidulafungin susceptibility of the mutants lacking *CHT2*,  
112 *CSU51* or *PGA4* by spot assay. (A and B) Shown are two independent repeats for growth of  
113 all single- or double-deletion mutants vs their parental strain CAF4-2 on medium  
114 supplemented with caspofungin (CAS) and for growth of representative double-deletion  
115 mutants vs their parental strain CAF4-2 on medium supplemented with anidulafungin (ANI).  
116 Strains are indicated on the left. From left to right, the number of cells that were spotted onto  
117 each plate, were  $10^4$ ,  $10^3$ ,  $10^2$ , and  $10^1$ . Plates were incubated at 37°C.

118

119

120

121

122

123

124

125

126

127

128

129

130



131  
132  
133  
134  
135  
136  
137  
138  
139  
140  
141  
142  
143  
144  
145  
146  
147  
148  
149  
150  
151  
152  
153  
154  
155  
156  
157

**Fig. S2**

**A**

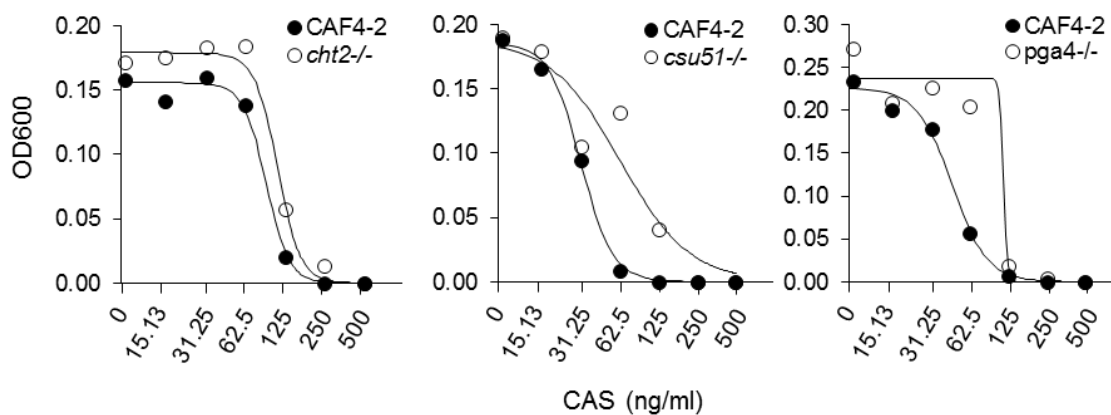

**B**

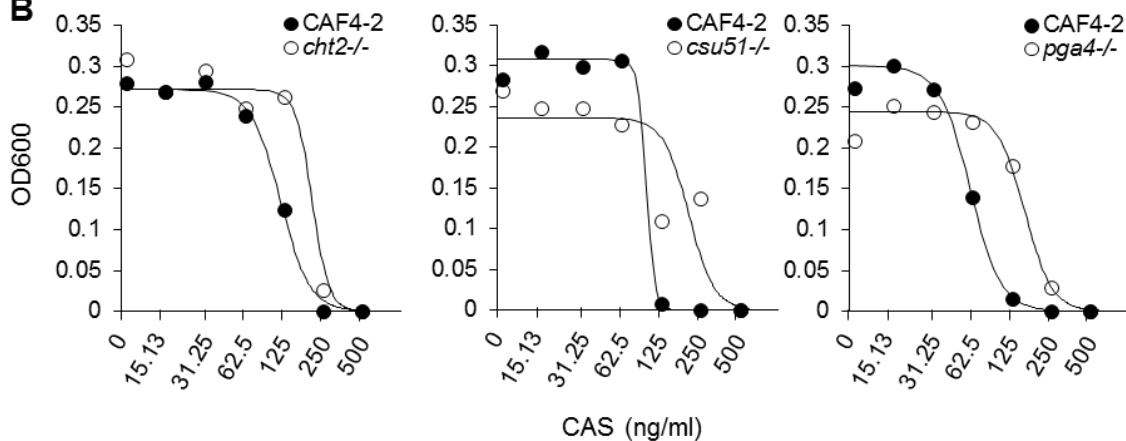

FIG S2 Analysis of caspofungin (CAS) susceptibility of the representative double-deletion mutants NAC4 a.k.a. *cht2*<sup>-/-</sup>, NACS1 a.k.a. *csu51*<sup>-/-</sup>, NAP88 a.k.a. *pga4*<sup>-/-</sup> by standard broth microdilution assay. (A and B) Shown are two independent repeats for growth of mutants vs their parental strain CAF4-2 in different concentration of caspofungin as indicated. For more explanations see the legend of Fig. 3B. Data are presented as the best fit curve (see Materials and Methods).

158  
 159  
 160  
 161  
 162  
 163  
 164  
 165  
 166  
 167  
 168  
 169  
 170  
 171  
 172  
 173  
 174  
 175  
 176  
 177  
 178  
 179  
 180  
 181  
 182  
 183  
 184

**Fig. S3**

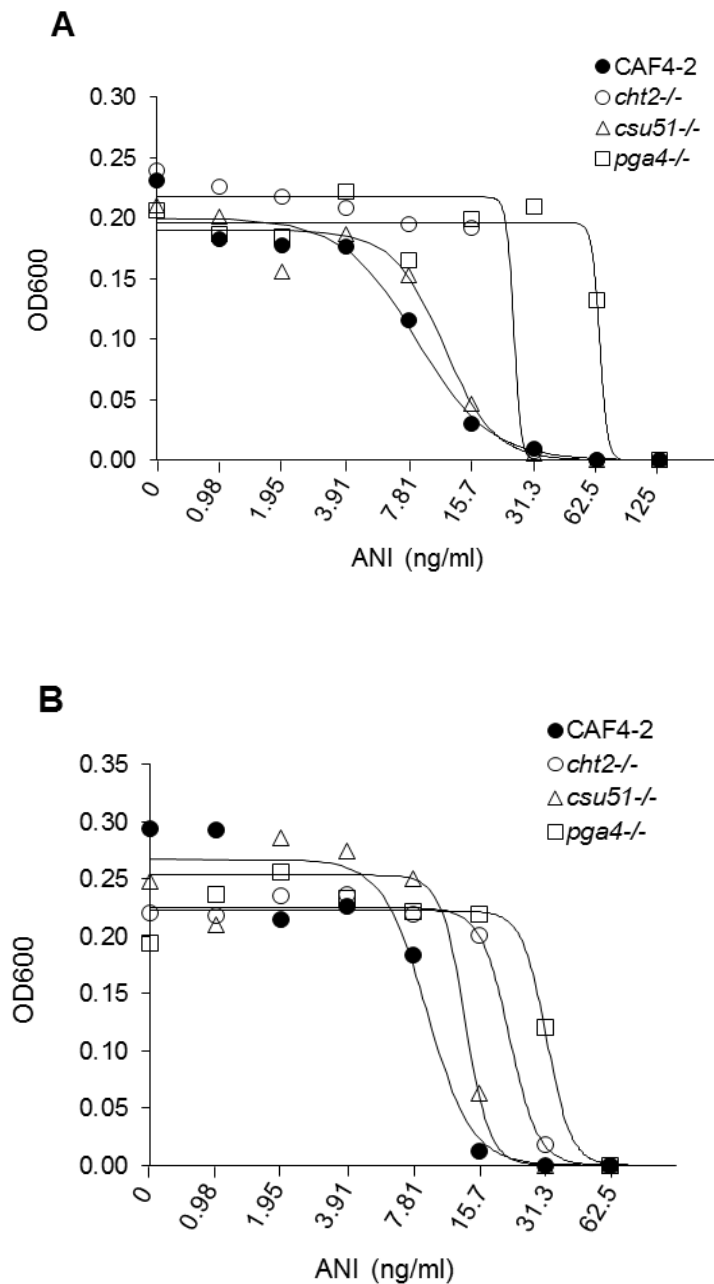

FIG S3 Analysis of anidulafungin (ANI) susceptibility of the representative double-deletion mutants NAC4 a.k.a. *cht2*<sup>-/-</sup>, NACS1 a.k.a. *csu51*<sup>-/-</sup>, NAP88 a.k.a. *pga4*<sup>-/-</sup> by standard broth microdilution assay. (A and B) Shown are two independent repeats for growth of mutants vs their parental strain CAF4-2 in different concentration of caspofungin as indicated. For more explanations see the legend of Fig. S3. Note that experiment was conducted on the same microtiter plate.

**Fig. S4**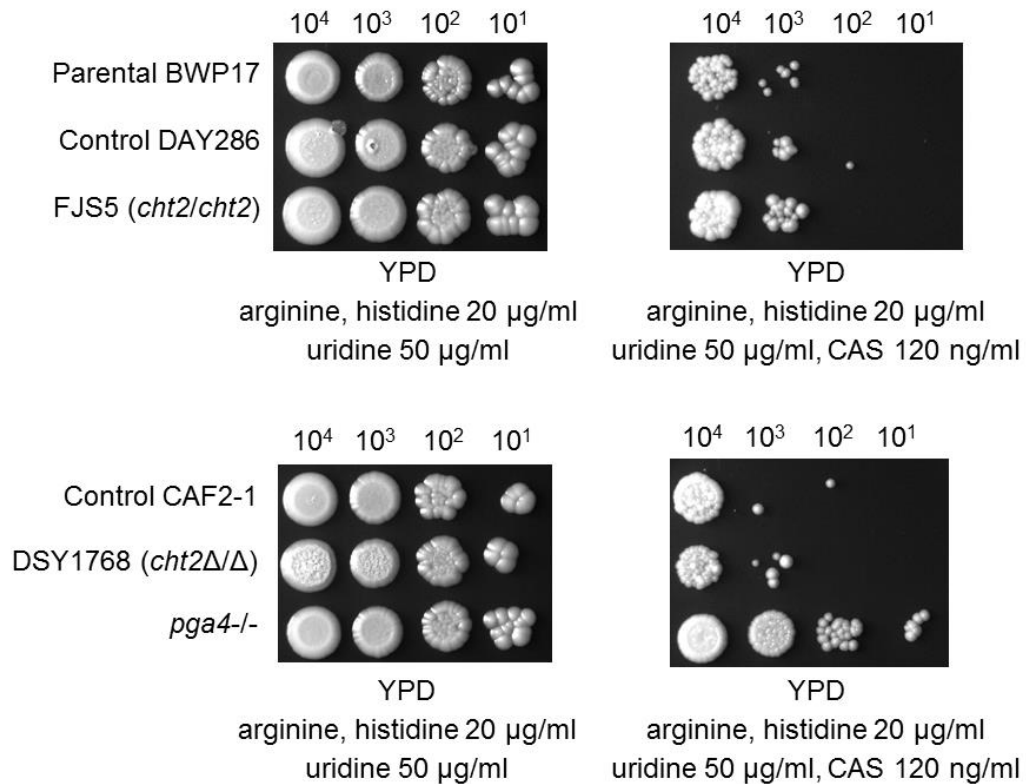

FIG S4 Analysis of caspofungin susceptibility of *pga4*<sup>-/-</sup> and FJS5 mutants with both copies of either *PGA4* (1) or *CHT2* (2), respectively, disrupted with the *Tn7*-UAU1 cassette, as well as of the mutant DSY1768 (3) having incomplete deletion of ORF of *CHT2*. Shown is the spot assay for growth of the mutant FJS5 vs the control strain DAY286 (and also vs the parental strain BWP17) or of the mutant DSY1768 or the mutant *pga4*<sup>-/-</sup> vs the control strain CAF2-1 on control YPD medium supplemented with arginine, histidine and uridine, as well as on YPD medium supplemented with the aforementioned aminoacids and caspofungin (CAS), as indicated. Strains are indicated on the left. From left to right,  $10^4$ ,  $10^3$ ,  $10^2$ , and  $10^1$  cells were spotted on each plate and incubated for 3 days at 37°C.

**Fig. S5**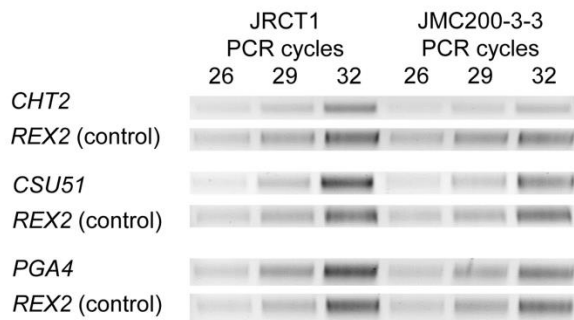

211

212

213 FIG S5 Example of semi-quantitative RT-PCR analysis of products amplified from total RNA

214 from deletion strain JMC200-3-3 and its parental strain JRCT1. The *CHT2*, *CSU51* or *PGA4*

215 gene was amplified and ran on a conventional electrophoresis gel, which was ethidium

216 bromide stained and photographed and the imaged was processed, as described in Materials

217 and Methods. Lanes show products sampled at increasing cycles. Values for the *CHT2*,218 *CSU51* or *PGA4* gene were normalized against control *REX2*. *CHT2*, *CSU51* or *PGA4*

219 monosomic to disomic (JMC200-3-3/JRCT1) ratio was calculated, as averaged from three

220 consecutive cycles.

221

222

223

224

225

226

227
